# Supplementary material
Source: PubMed Central journal article supplement (PMC5886147)
Supplement: ddx158_supp.pdf [file ddx158_supp.pdf]

## SUPPLEMENTAL MATERIAL

### Novel Degenerative and Developmental Defects in a Zebrafish Model of Mucopolidosis Type

#### IV

Li H, Pei W, Vergarajauregui S, Zerfas PM, Raben N, Burgess SM, and Puertollano R

The Supplemental material includes eight Supplemental Figures:

**Supplemental Figure S1.** Skeletal muscle pathology in adult *mcoln1ab*<sup>-/-</sup> mutants

**Supplemental Figure S2.** MicroCT images of skeleton structure of adult WT and *mcoln1ab*<sup>-/-</sup> zebrafish for both male (M) and female (F)

**Supplemental Figure S3.** Eye pathology in *mcoln1* mutants at 3 dpf

**Supplemental Figure S4.** Retina structure in *mcoln1* mutants at 3 dpf

**Supplemental Figure S5.** Cornea structure in adult *mcoln1* mutants

**Supplemental Figure S6.** Hair cell viability and morphology in *mcoln1a*<sup>-/-</sup> and *mcoln1b*<sup>-/-</sup> larvae

**Supplemental Figure S7.** Hair cell regeneration and sensitivity to antibiotics in *mcoln1ab*<sup>-/-</sup> larvae at 5 dpf

**Supplemental Figure S8.** Hair cell mitochondria in *mcoln1ab*<sup>-/-</sup> larvae at 5 dpf

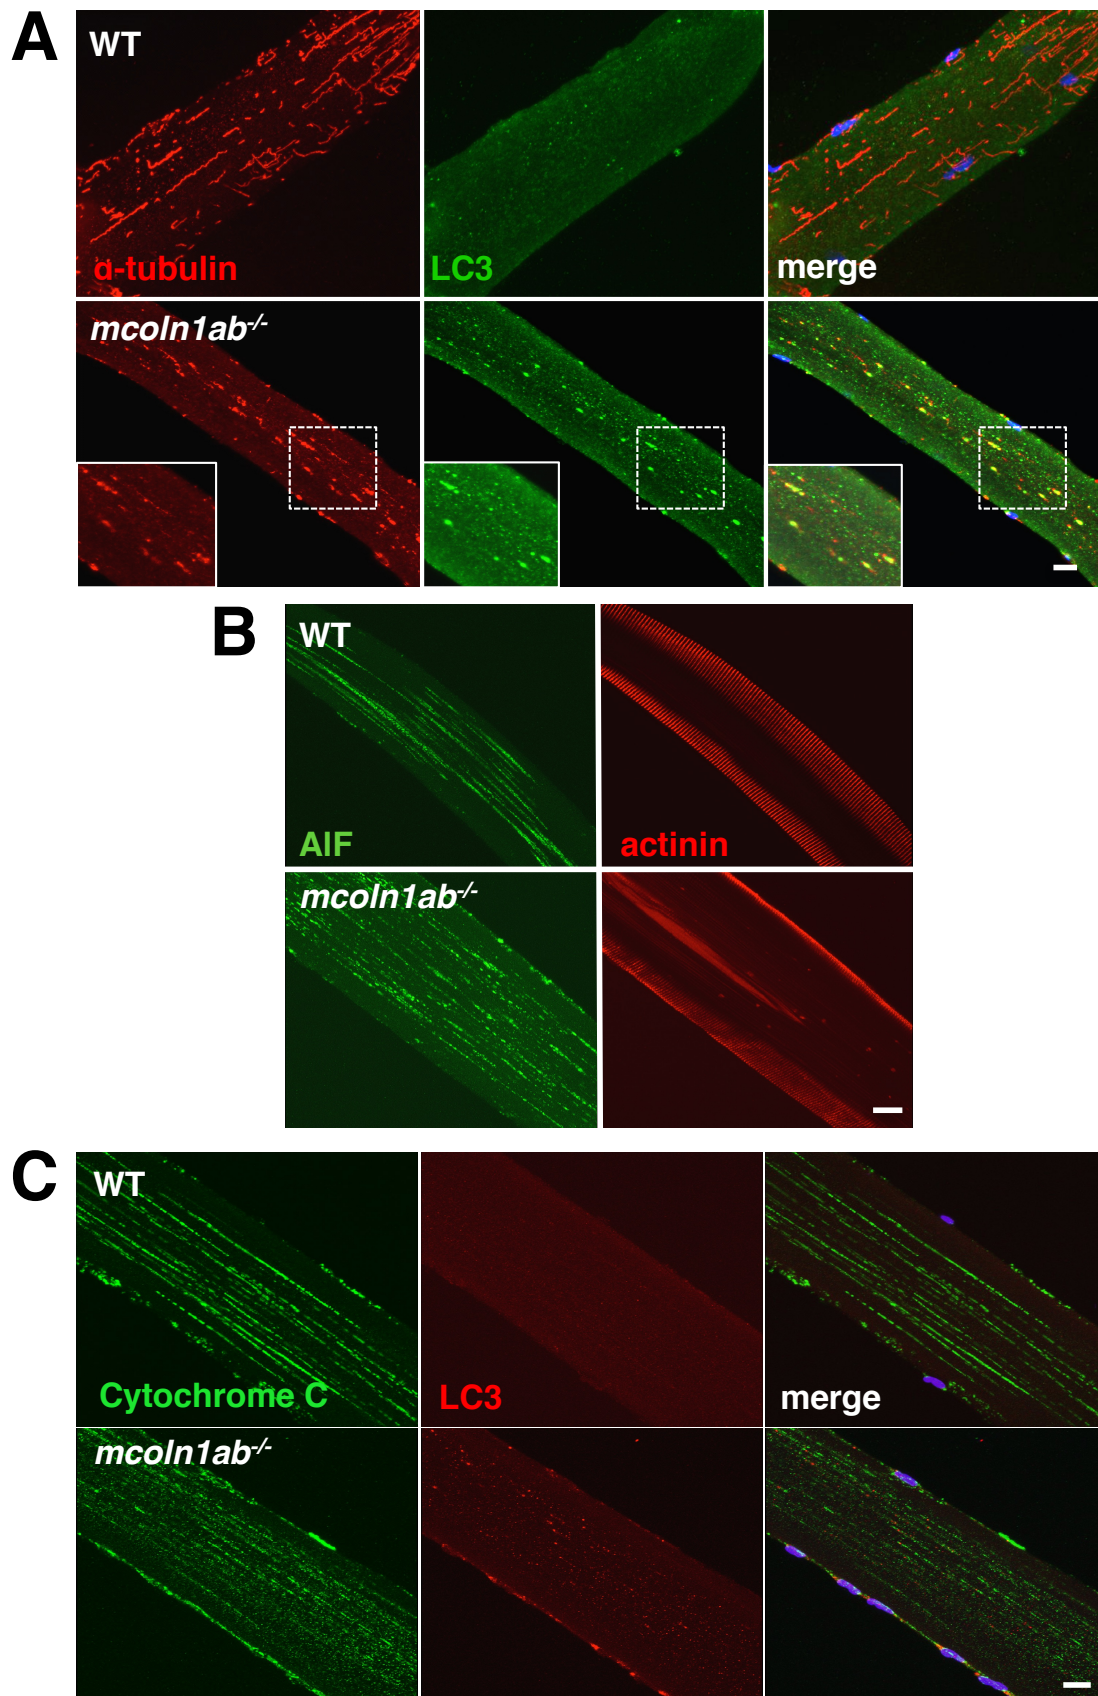

**Supplemental Figure S1. Skeletal muscle pathology in adult *mcoln1ab*<sup>-/-</sup> mutants (A)** Co-immunostaining for  $\alpha$ -tubulin, LC3, and DAPI in single muscle fiber dissected from 8-month-old WT and *mcoln1ab*<sup>-/-</sup> zebrafish. **(B)** Co-immunostaining for AIF and actinin in single muscle fiber dissected from 12-month-old WT and *mcoln1ab*<sup>-/-</sup> zebrafish. Scale bar, 10  $\mu$ m. **(C)** Co-immunostaining for cytochrome C, LC3, and DAPI in single muscle fiber dissected from 4-month-old WT and *mcoln1ab*<sup>-/-</sup> zebrafish. Scale bar, 10  $\mu$ m.

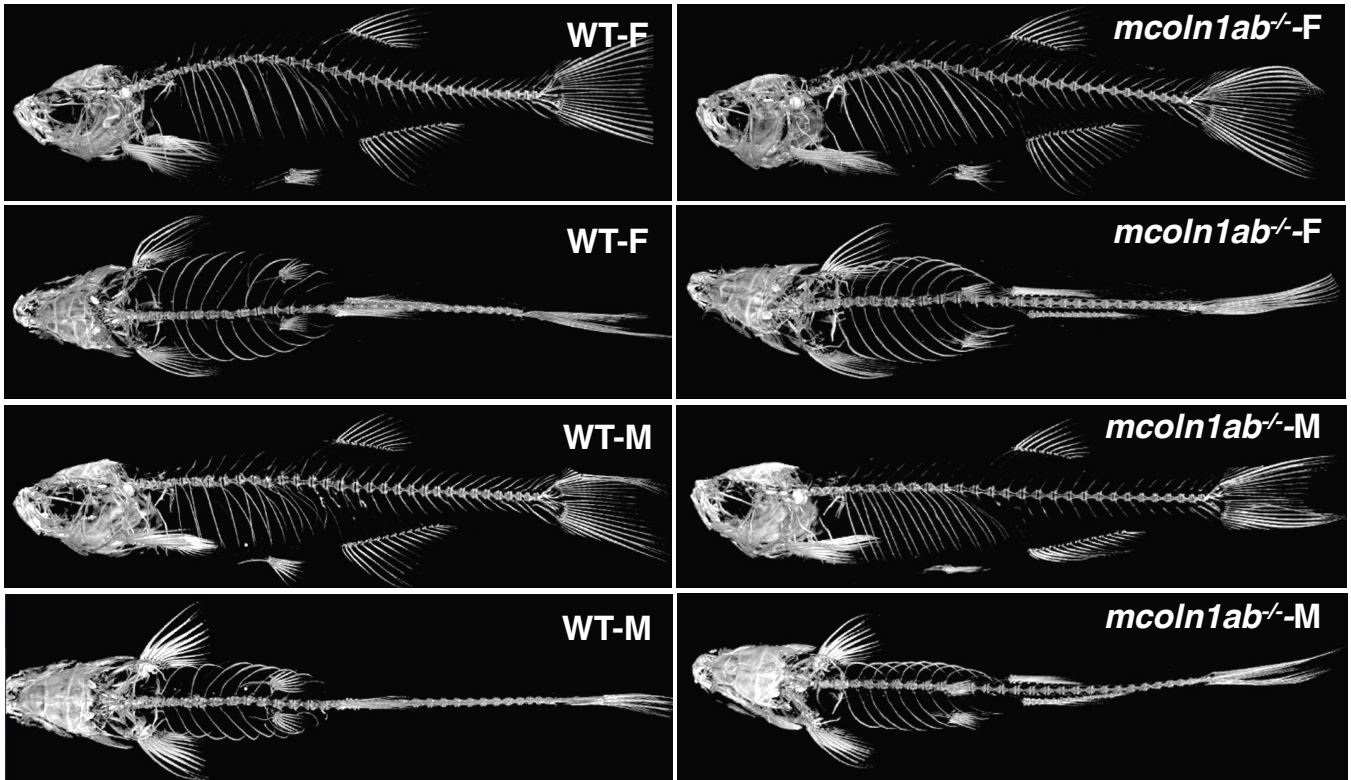

Supplemental Figure S2. MicroCT images of skeleton structure of adult WT and *mcoln1ab*<sup>-/-</sup> zebrafish for both male (M) and female (F).

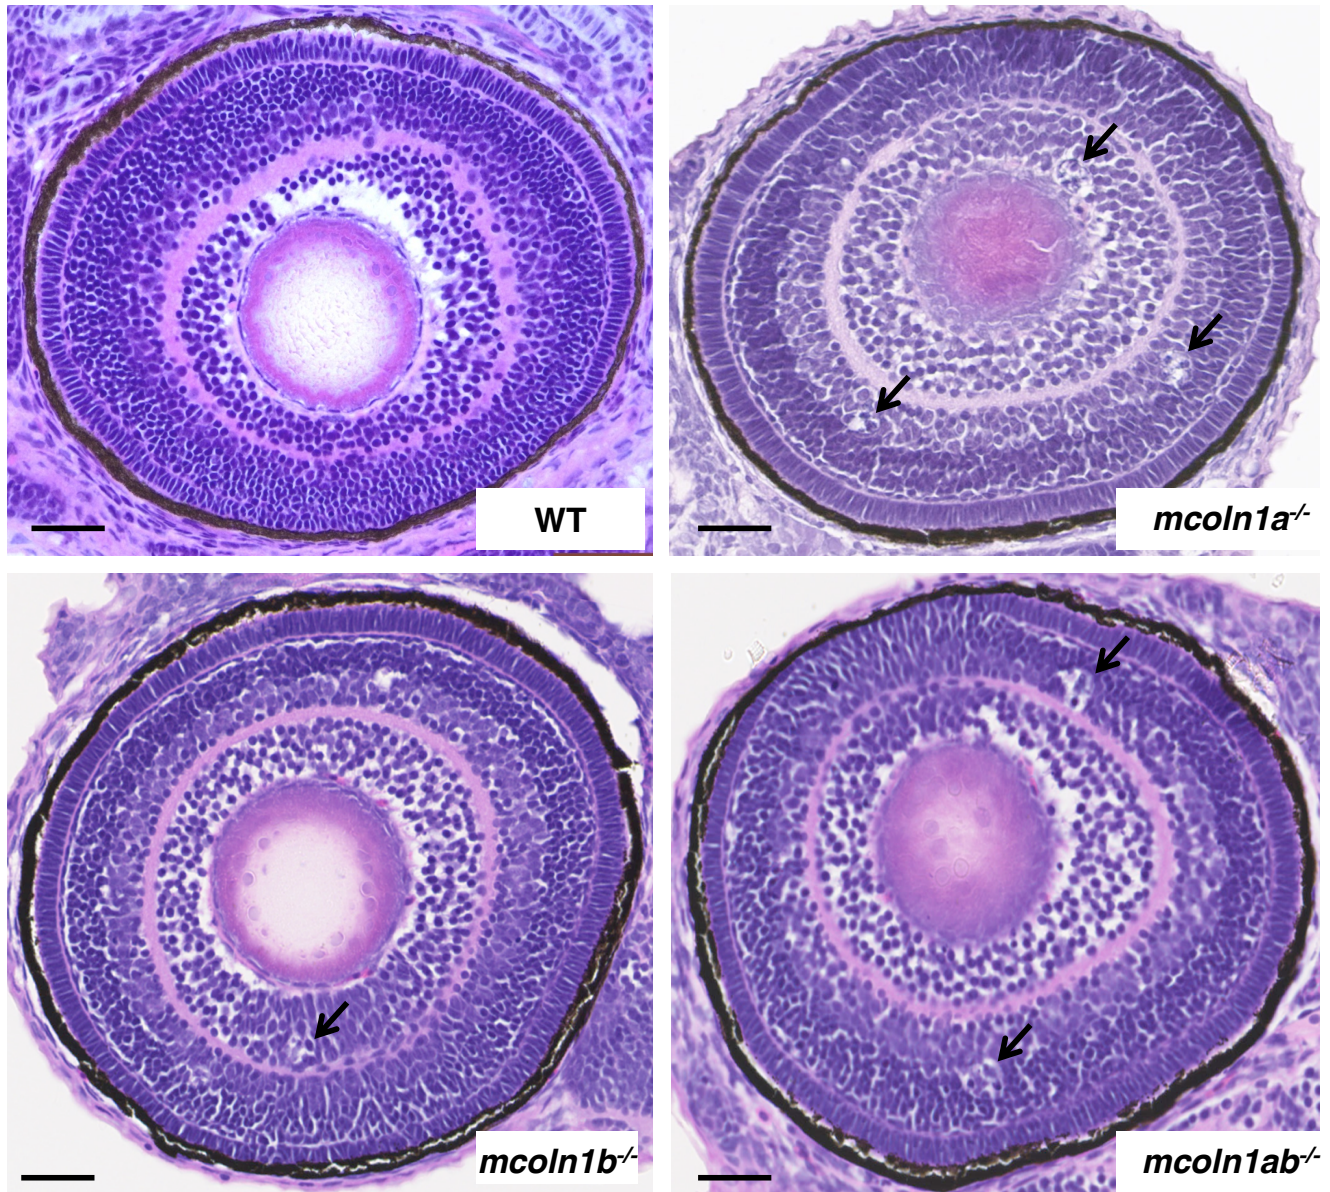

**Supplemental Figure S3. Eye pathology in *mcoln1* mutants at 3 dpf.** H&E staining on paraffin sections of 3 dpf zebrafish embryos showing the eye structure in WT and *mcoln1* mutants. Black arrows mark the apoptotic body-like structures. Scale bar, 50  $\mu$ m.

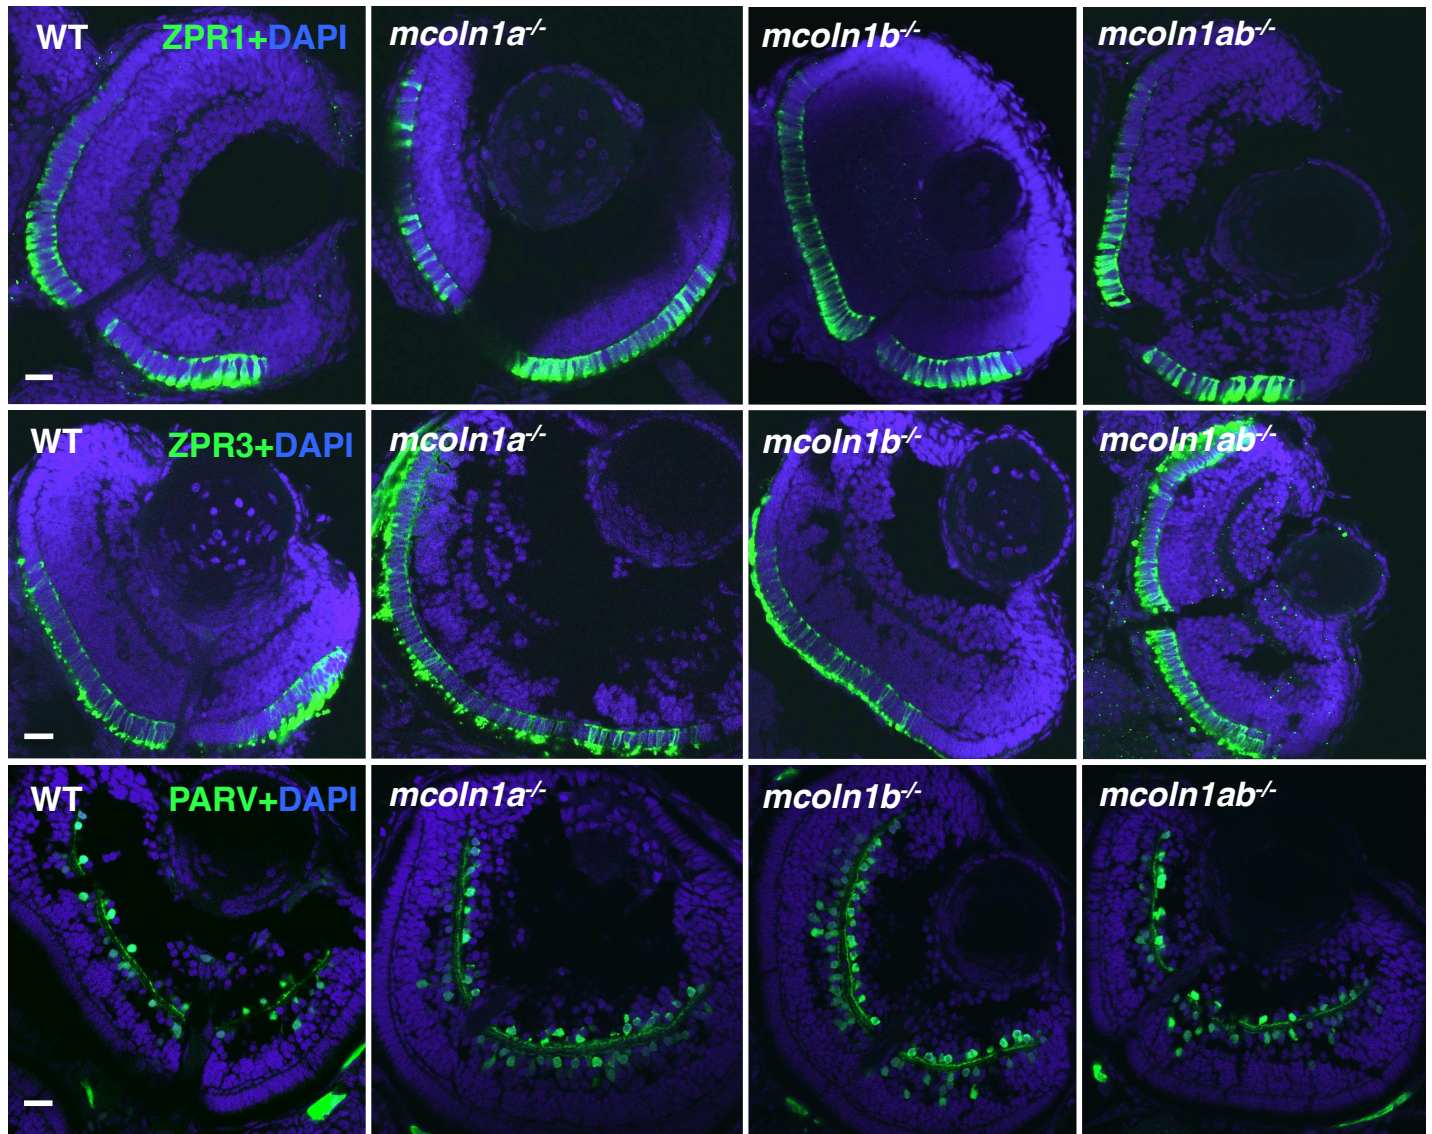

**Supplemental Figure S4. Retina structure in *mcoln1* mutants at 3 dpf.** Immunostaining on cryostat sections of 3 dpf zebrafish eyes showing the cone photoreceptors (ZPR1), the rod photoreceptors (ZPR3) and amacrine cells (PARV) in WT and *mcoln1* mutants. Scale bar, 20  $\mu$ m.

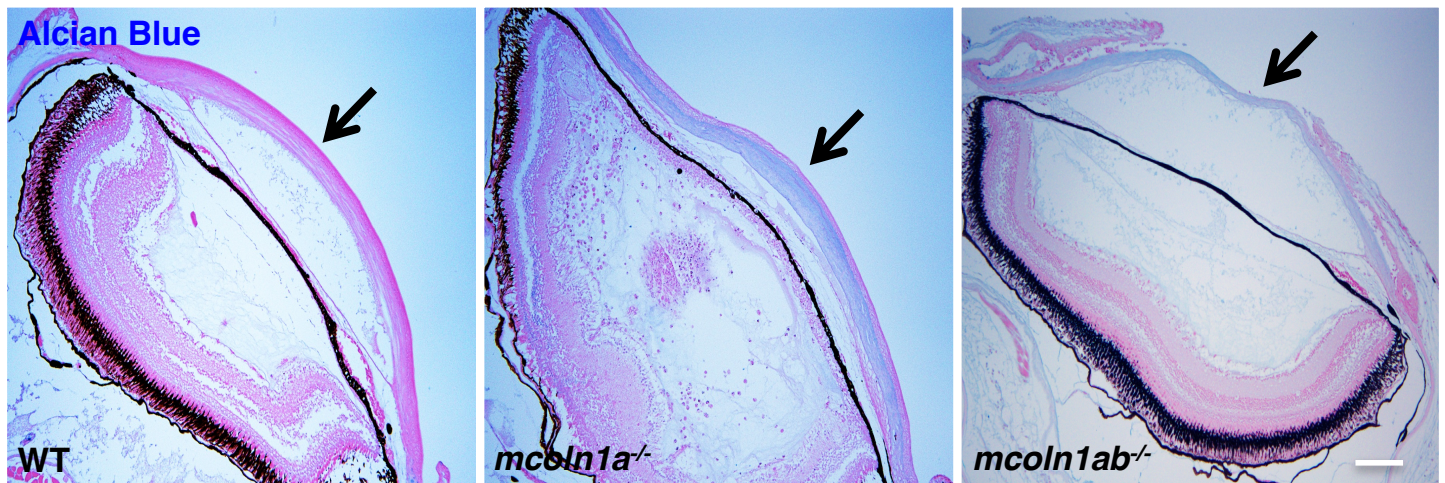

**Supplemental Figure S5. Cornea structure in adult *mcoln1* mutants.** Alcian Blue staining on paraffin sections of adult zebrafish eye for WT, *mcoln1a*<sup>-/-</sup> and *mcoln1ab*<sup>-/-</sup>. Black arrows mark the cornea. Scale bar, 50  $\mu$ m.

**A**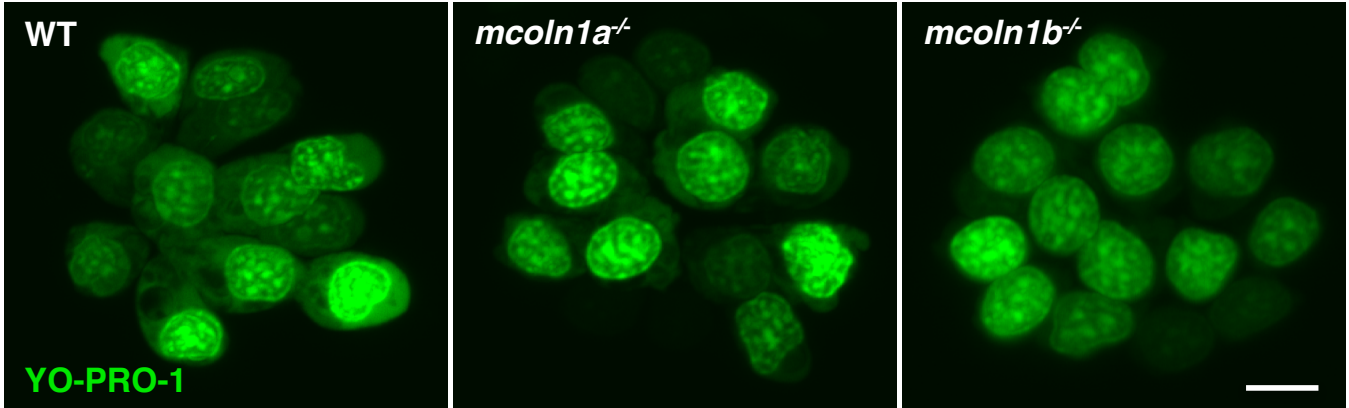**B**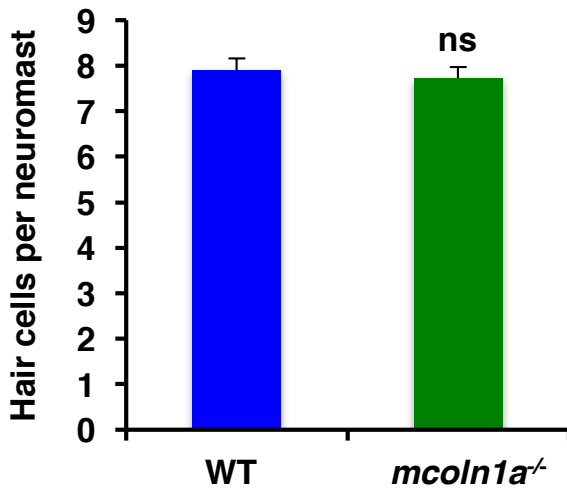**C**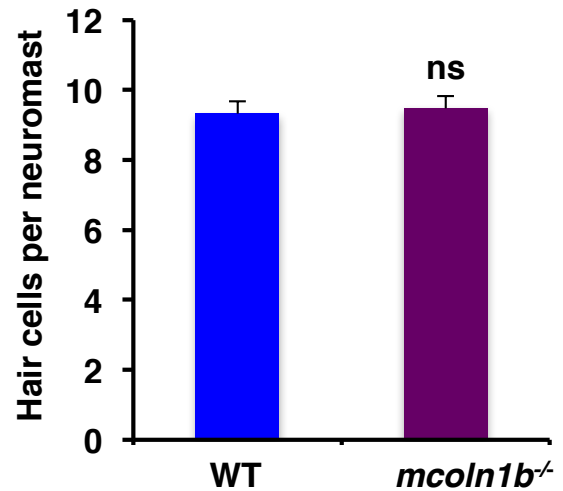

**Supplemental Figure S6. Hair cell viability and morphology in *mcoln1a*<sup>-/-</sup> and *mcoln1b*<sup>-/-</sup> larvae.** (A) YO-PRO-1 staining in live zebrafish larvae showing hair cell morphology in WT, *mcoln1a*<sup>-/-</sup> and *mcoln1b*<sup>-/-</sup> larvae at 5 dpf. Scale bar, 5  $\mu$ m. (B,C) Quantification of hair cell number per neuromast in YO-PRO-1 stained WT and *mcoln1a*<sup>-/-</sup> (B) or WT and *mcoln1b*<sup>-/-</sup> (C) 5 dpf larvae. Data are shown as mean $\pm$ SD and represent 40 neuromast from 10 embryos per genotype counted in a representative experiment. The data were analyzed using paired t test (ns, not significant).

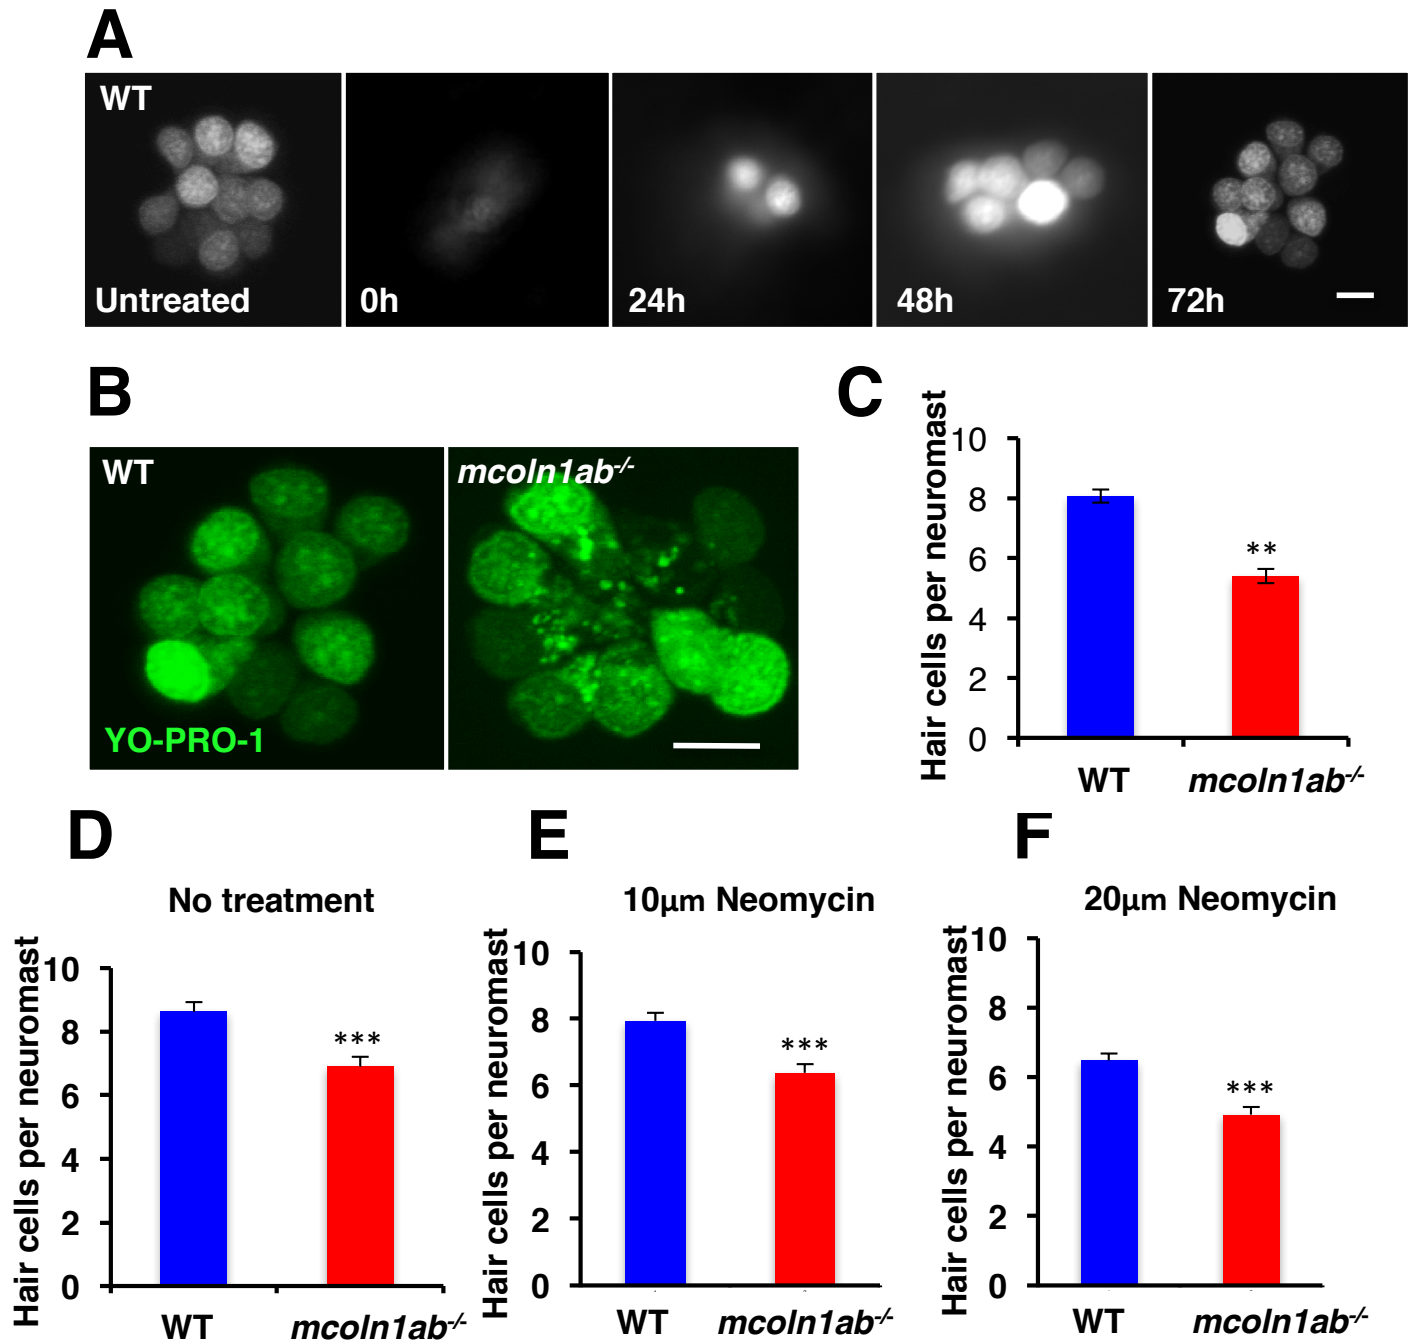

**Supplemental Figure S7. Hair cell regeneration and sensitivity to antibiotics in *mcoln1ab*<sup>-/-</sup> larvae at 5 dpf.** (A) YO-PRO-1 staining showing hair cell regeneration after 10  $\mu$ M copper sulfate treatment in WT larvae at 5 dpf. Scale bar, 5  $\mu$ m. (B) YO-PRO-1 staining showing hair cell morphology after 10  $\mu$ M copper sulfate treatment at 5 dpf followed by 48 h recovery in WT and *mcoln1ab*<sup>-/-</sup> larvae. Scale bar, 5  $\mu$ m. (C) Quantification of the experiment shown in (B). Data are shown as mean $\pm$ SD and represent 30 neuromasts from 10 embryos per genotype counted in a representative experiment. The data were analyzed using paired t test (\*\* $p$ <0.01). (D-F) Quantification of the number of hair cells per neuromast in WT and *mcoln1ab*<sup>-/-</sup> mutants for non-treated (D), 10 $\mu$ m neomycin-treated (E) and 20 $\mu$ m neomycin-treated (F) 5 dpf larvae. Data are shown as mean $\pm$ SD and represent 40 neuromasts from 10 embryos per genotype. The data were analyzed using paired t test (\*\* $p$ <0.001).



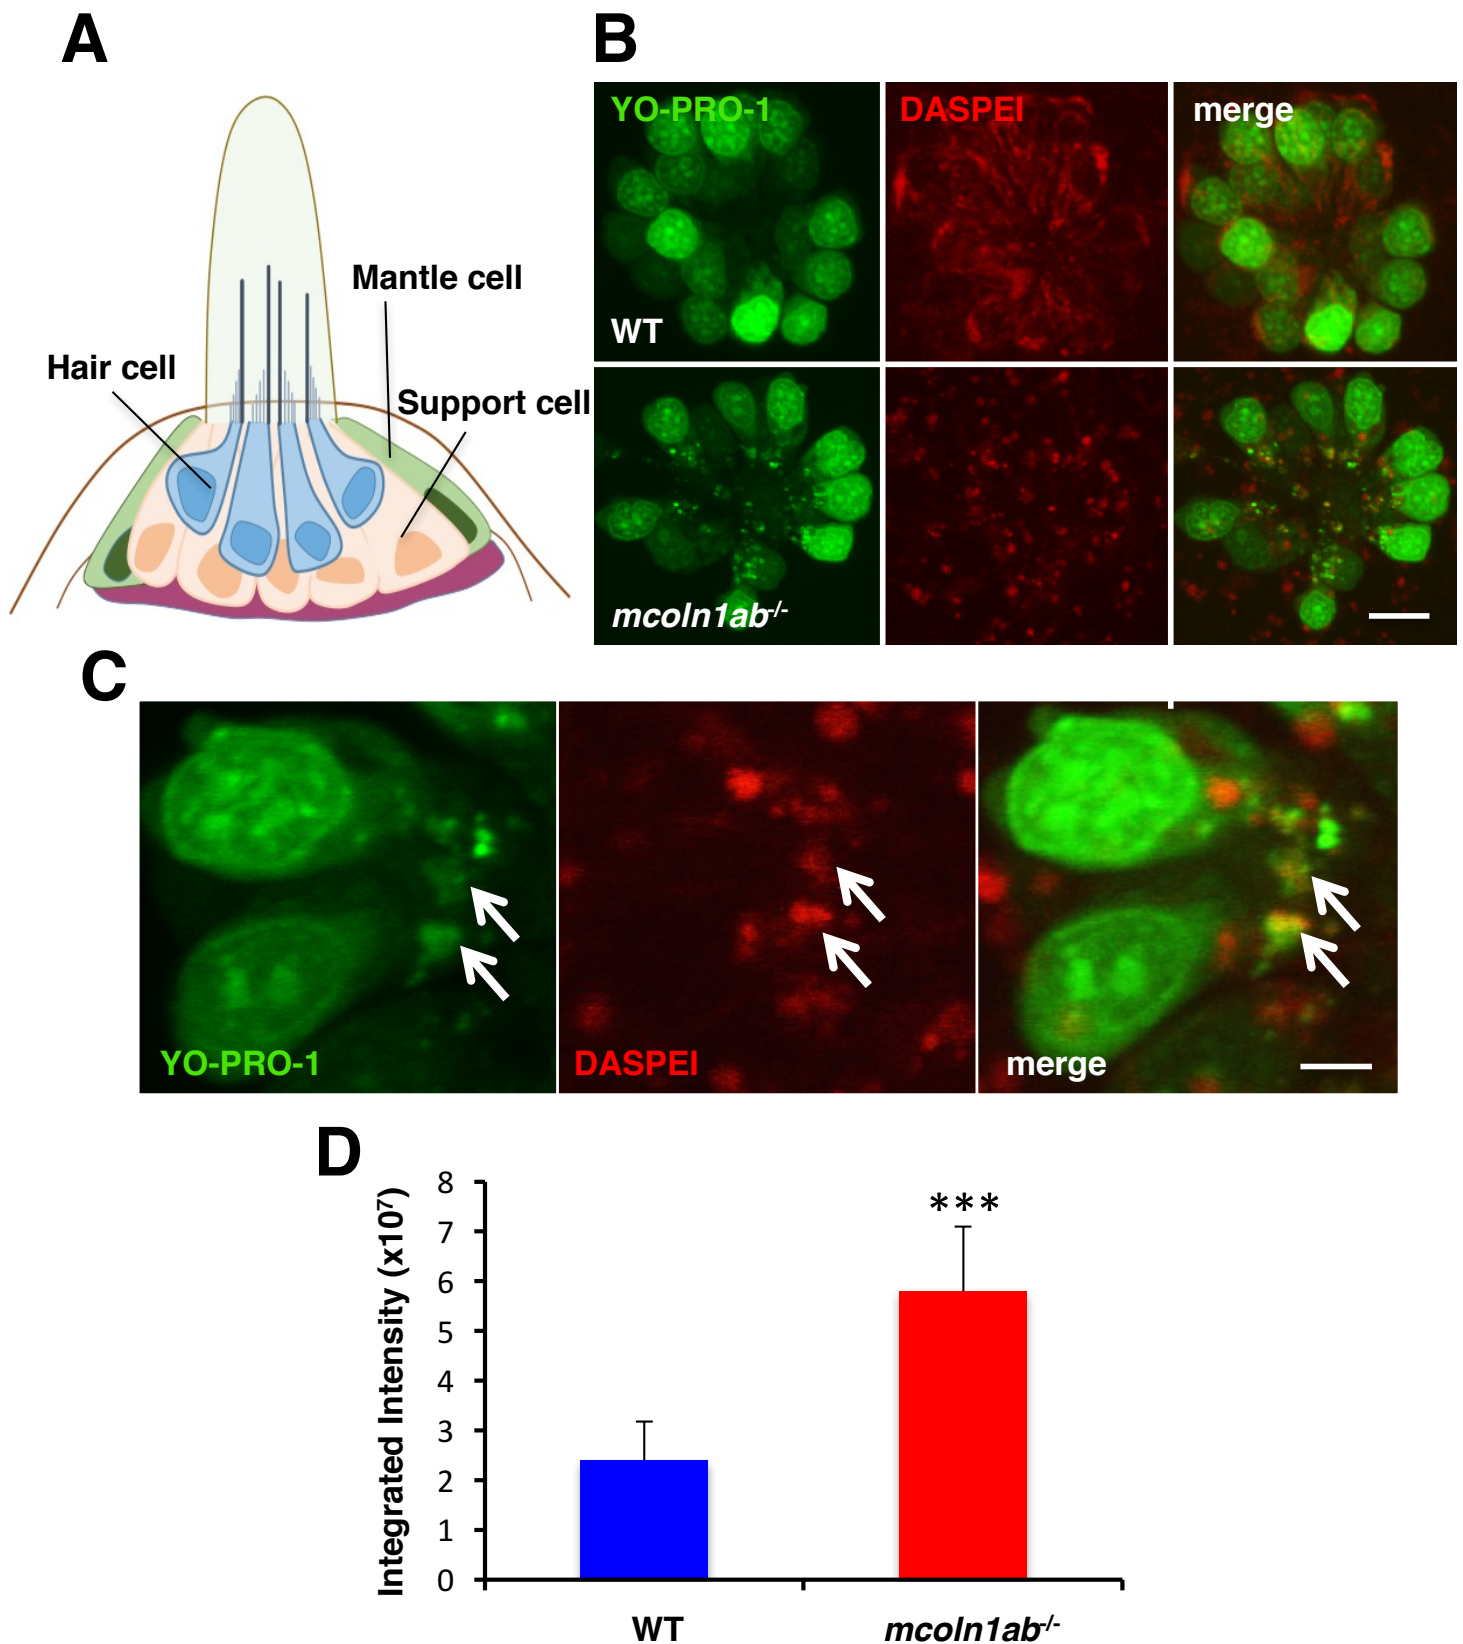

**Supplemental Figure S8. Hair cell mitochondria in *mcoln1ab<sup>-/-</sup>* larvae at 5 dpf. (A)** Cartoon for neuromast structure. **(B)** YO-PRO-1 and DASPEI staining in WT and *mcoln1ab<sup>-/-</sup>* larvae at 5 dpf. Scale bar, 5  $\mu$ m. **(C)** Higher magnification showing co-staining of YO-PRO-1 and DASPEI in *mcoln1ab<sup>-/-</sup>* hair cells. Scale bar, 2  $\mu$ m. **(D)** Quantification of hair cell mitoSOX staining histogram intensity at 5 dpf. Data are shown as mean $\pm$ SD and represent 6 hair cells counted in a representative experiment. The data were analyzed using paired t test (\*\*\*) $p < 0.001$ ).
